# Supplementary material
Source: PubMed Central journal article supplement (PMC10233522)
Supplement: 604_2023_5827_MOESM1_ESM.pdf [file 604_2023_5827_MOESM1_ESM.pdf]

## Supplementary Information

**Hydrogel Capsule-Based Digital Quantitative Polymerase Chain Reaction**

Zheng Lin Tan\*, Masato Yasuura, Yukichi Horiguchi, Hiroki Ashiba, Takashi Fukuda\*

Sensing System Research Center, National Institute of Advanced Industrial Science and Technology (AIST),  
Central 5, 1-1-1 Higashi, Tsukuba, Ibaraki, 305-8565, Japan\* Corresponding to Takashi Fukuda ([t-fukuda@aist.go.jp](mailto:t-fukuda@aist.go.jp)) and Zheng Lin Tan ([tan.zhenglin@aist.go.jp](mailto:tan.zhenglin@aist.go.jp))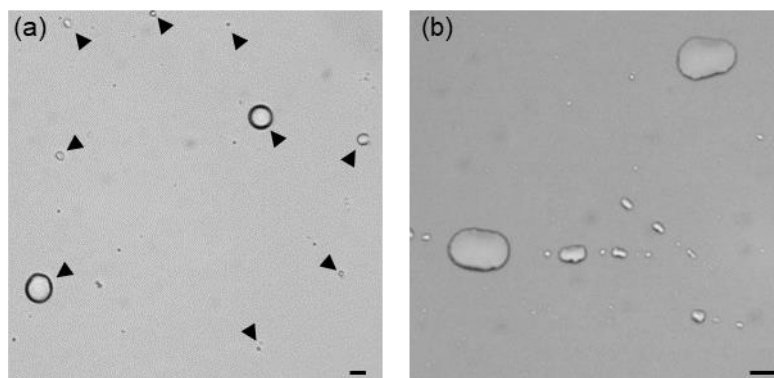

**Figure S1** Cross-linking of sodium alginate by barium chloride is reversible. Barium alginate gel microdroplets (a) before and (b) after ethylenediaminetetraacetic acid treatment. Ethylenediaminetetraacetic acid dissolved the gel shell of barium chloride, which results in further compression and coalescence of droplets. The scale bars are 10  $\mu\text{m}$ .

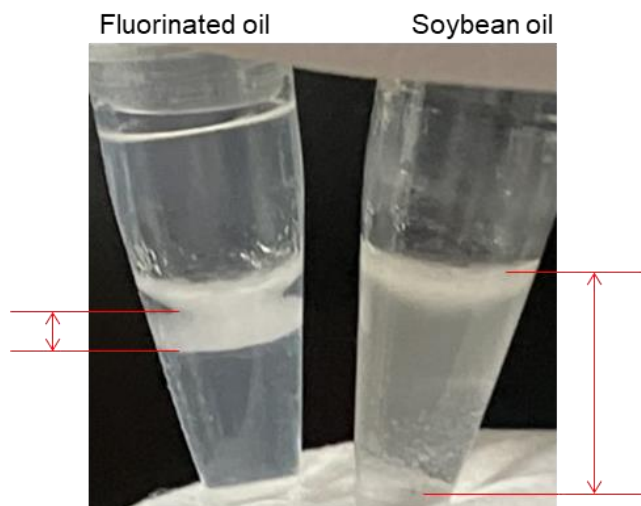

**Figure S2** Suspension of hydrogel capsule in fluorinated oil and soybean oil after thermal cycling. Region marks in red indicates the region where emulsion was suspended.
